# Supplementary material for: Phenyl substituted indenylphosphine ruthenium complexes as catalysts for dehydrogenation of alcohols
Source: Royal Society of Chemistry journal article supplement (doi:10.1039/c2dt30499f), 2012-01-01

## Supporting Information

# Phenyl-Substituted Indenylphosphine Ruthenium Complexes as Catalysts for Dehydrogenation of Alcohols

Jia Yuan,<sup>a</sup> Yue Sun,<sup>a</sup> Guang-Ao Yu,<sup>\*a</sup> Cui Zhao,<sup>a</sup> Neng-Fang She,<sup>b</sup> Shu-Lan Mao,<sup>c</sup>  
Peng-Shou Huang,<sup>a</sup> Zhi-Jun Han,<sup>a</sup> Jun Yin,<sup>a</sup> Sheng-Hua Liu<sup>\*a</sup>  
*E-Mail: yuguang@mail.ccnu.edu.cn, chshliu@mail.ccnu.edu.cn*

### S1 <sup>31</sup>P NMR spectrum of reaction of **10** and **2**

20120410-yj0463-08-p31  
yj0463-08 p31  
20120410

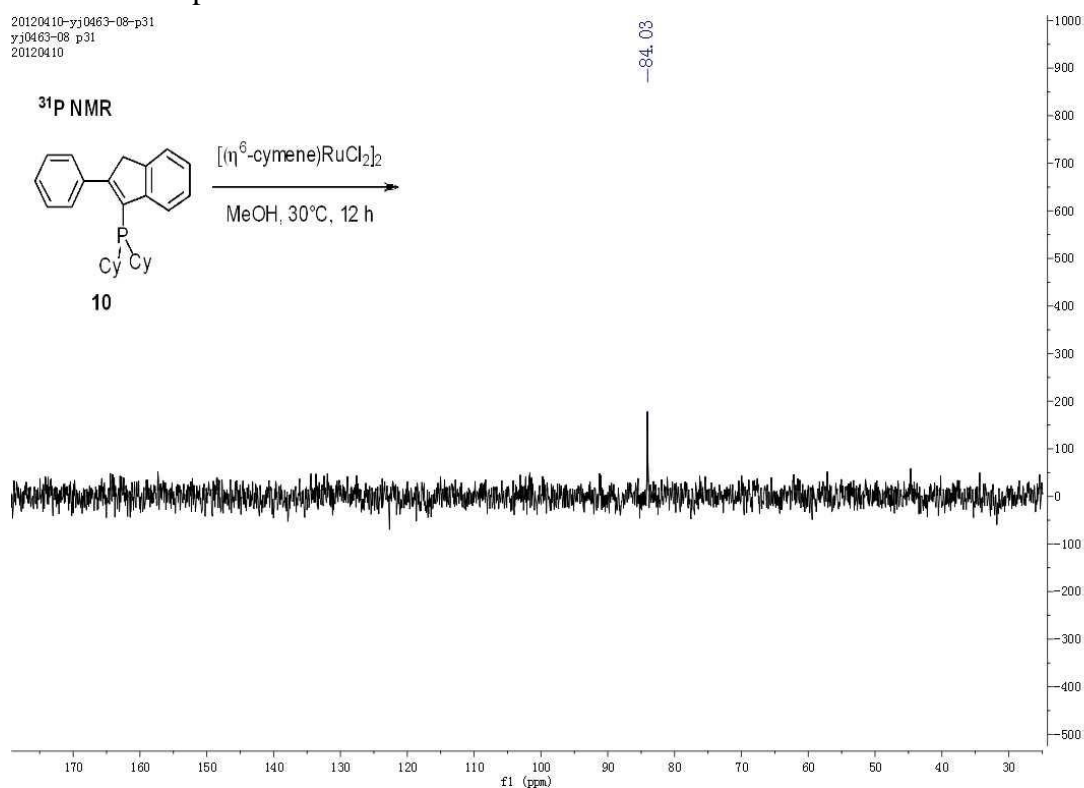

20120412-yj0465-08a-p31  
yj0465-08a p31  
20120412

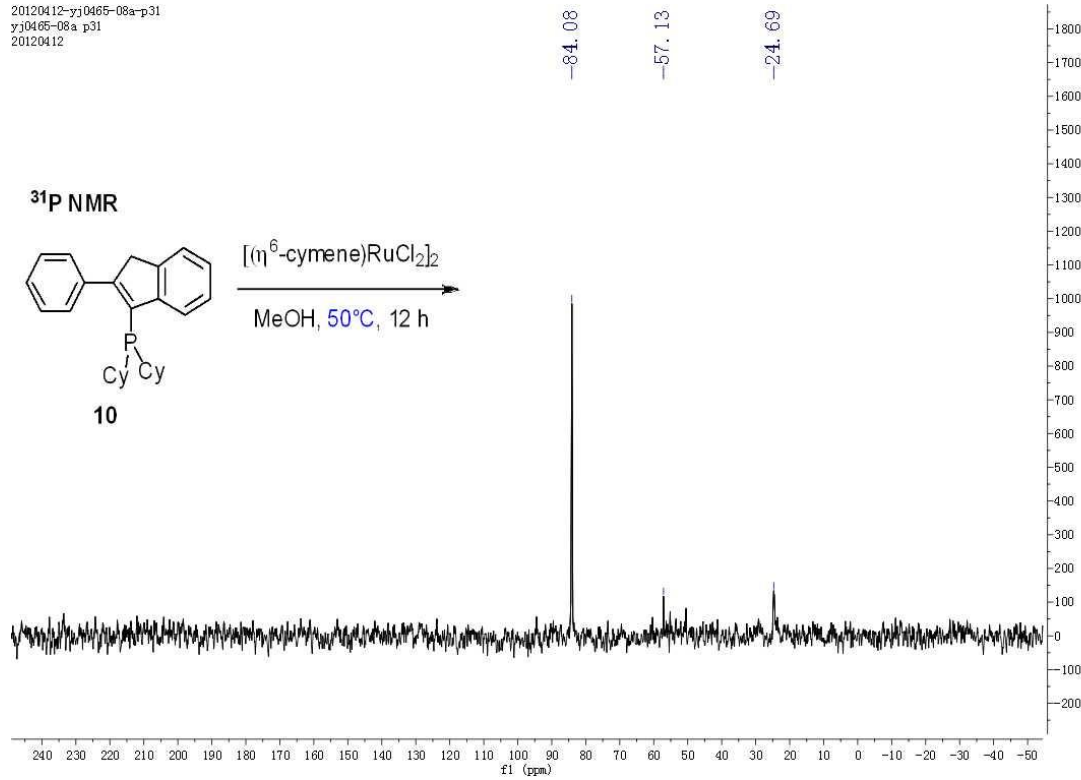

60C 20120416-yj08-60c-p31  
yj08-60c p31  
20120416

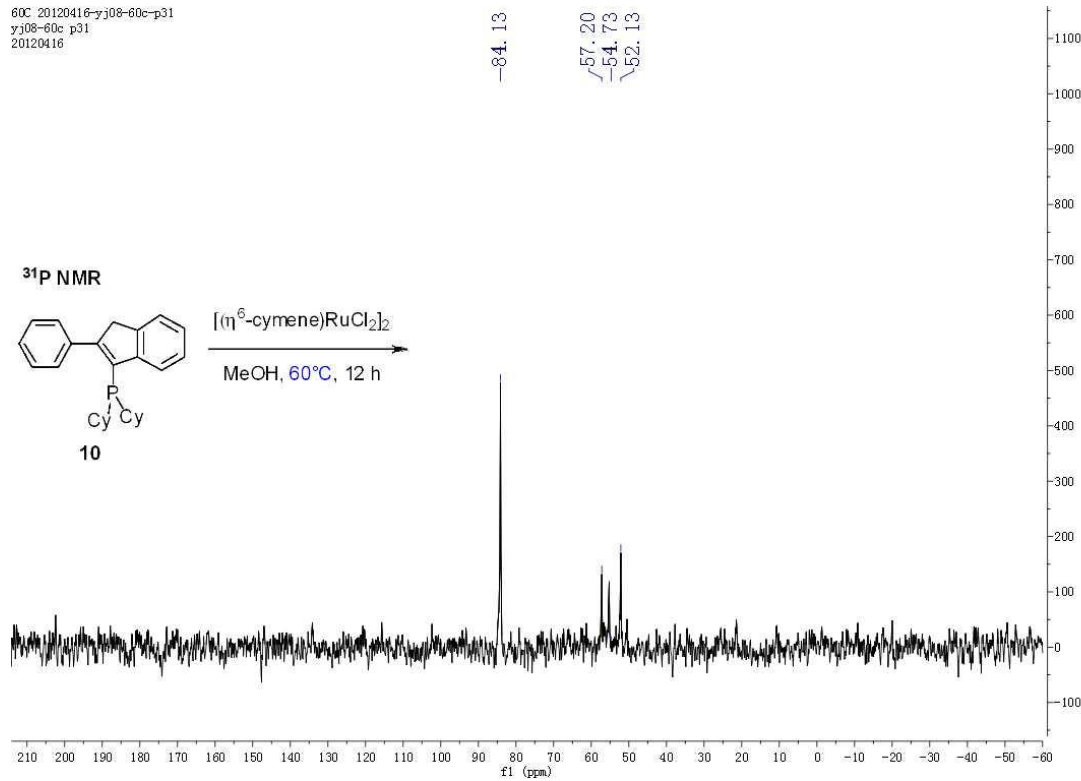

65C\_20120416-yj08-70c-p31  
yj08-70c p31  
20120416

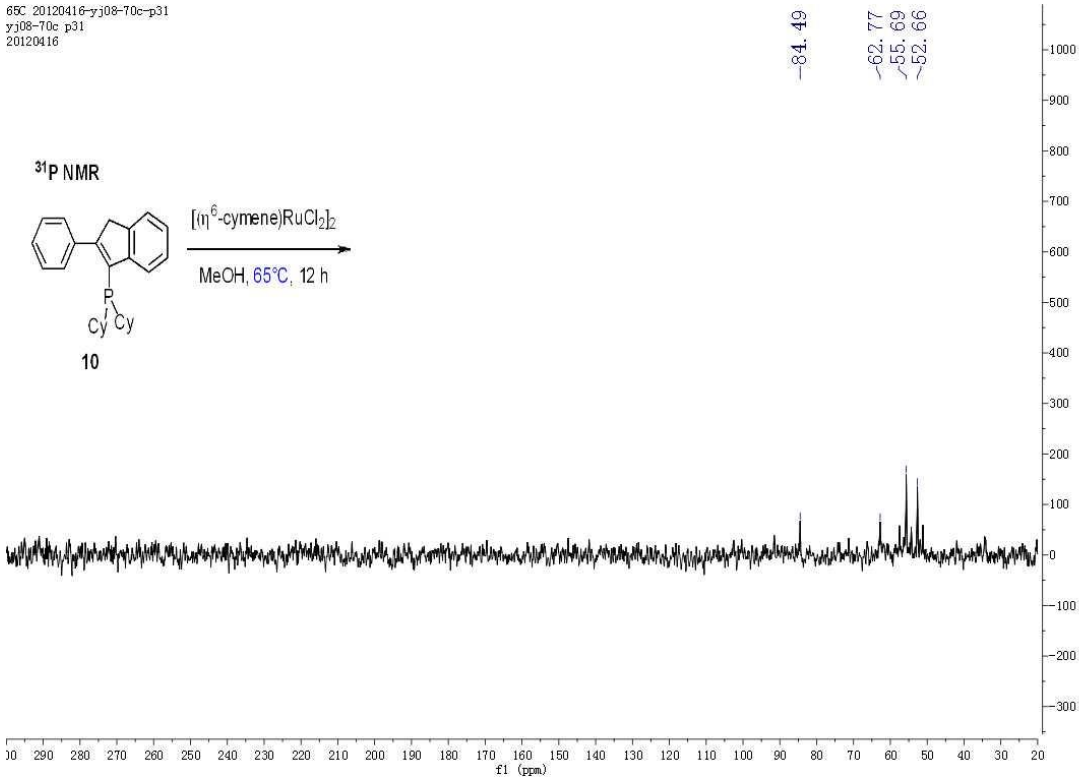

**S2 <sup>31</sup>P NMR spectrum of reaction of 5 and 2**

80C\_20120410-yj0463-09-p31  
yj0463-09 p31  
20120410

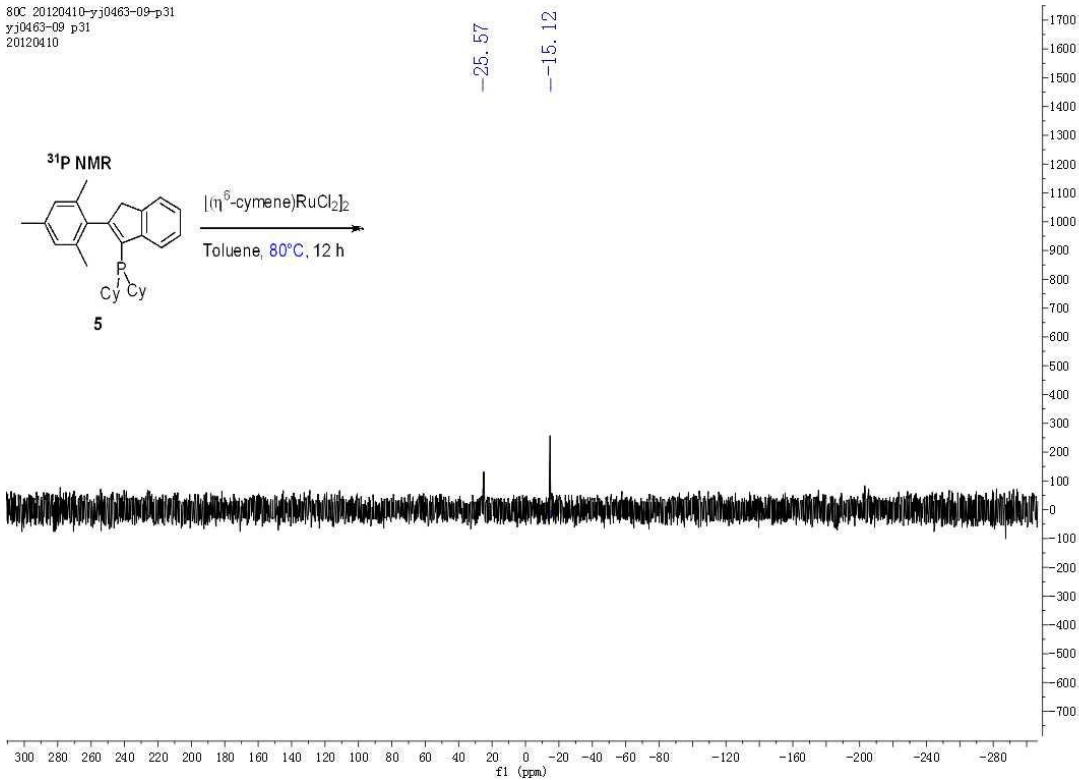

90C 20120412-yj0464-09-p31  
yj0464-09 p31  
20120412

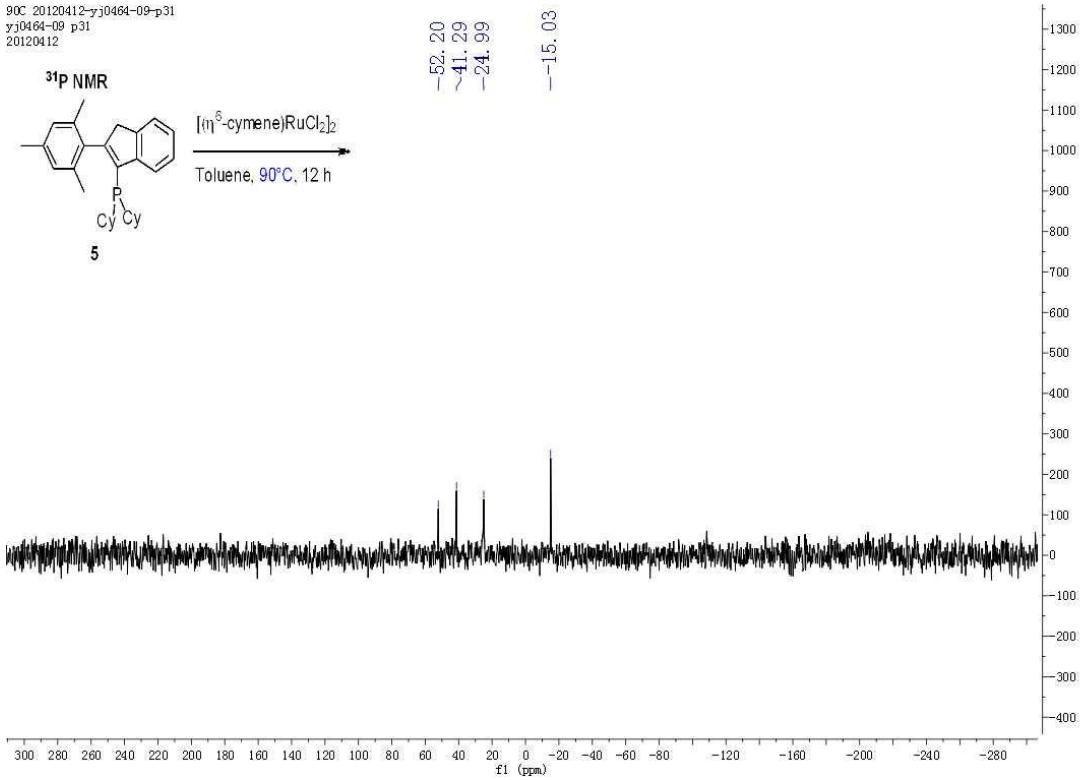

100C 20120412-yj0465-09a-p31  
yj0465-09a p31  
20120412

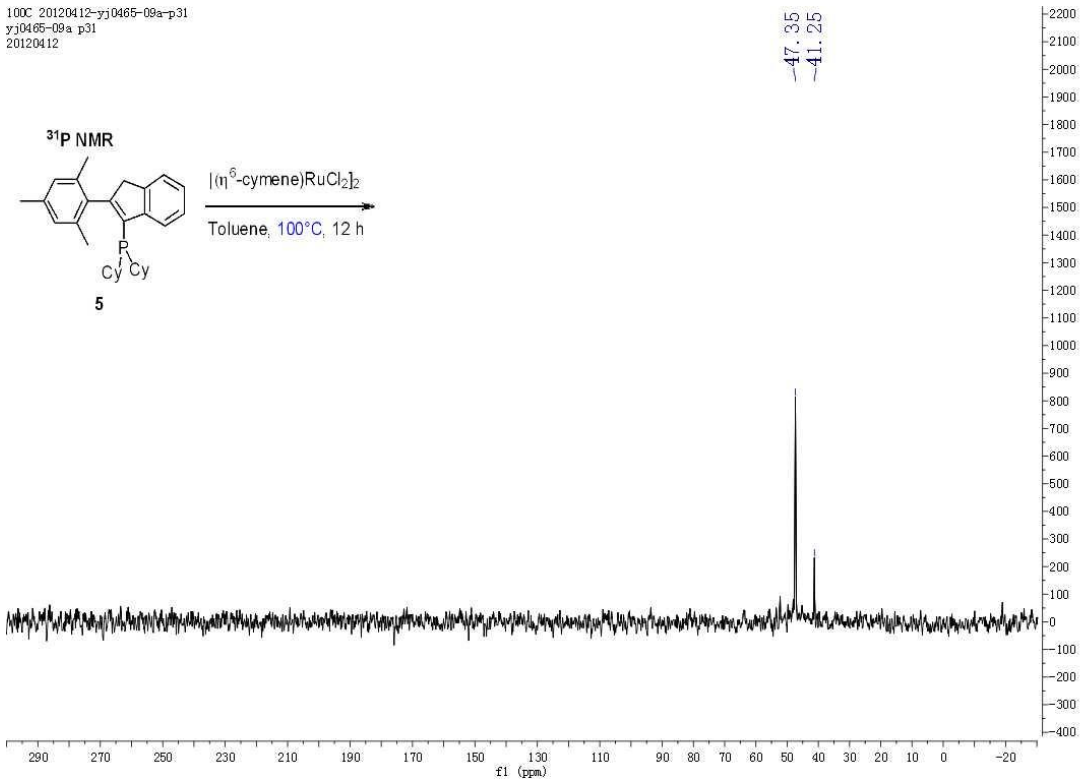

110C 20120412-yj0465-09b-p31  
yj0465-09b p31  
20120412

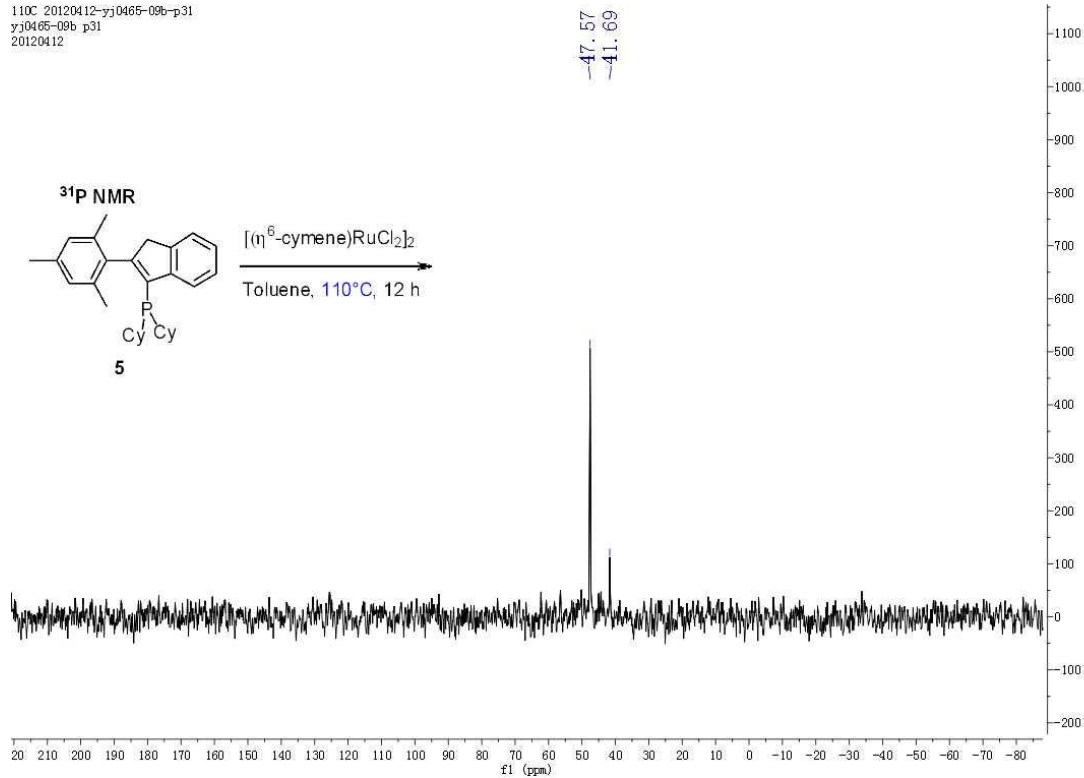

Supplement: c2dt30499f.pdf [file c2dt30499f.pdf]
